# Supplementary material for: Highly efficient hydrogen evolution from water electrolysis using nanocrystalline transition metal phosphide catalysts
Source: Royal Society of Chemistry journal article supplement (doi:10.1039/c8ra07195k), 2018-01-01

**Electronic Supplementary Information**  
**for**  
**Highly efficient hydrogen evolution from water electrolysis using**  
**nanocrystalline transition metal phosphide catalysts**

Weiming Wu, Xiao-Yuan Wu, Sa-Sa Wang and Can-Zhong Lu\*

CAS Key Laboratory of Design and Assembly of Functional Nanostructures, and  
Fujian Provincial Key Laboratory of Nanomaterials, Fujian Institute of Research on  
the Structure of Matter, Chinese Academy of Sciences, Fuzhou, Fujian 350002, China

\* Corresponding author: Prof. Can-Zhong Lu

E-mail: czlu@fjirsm.ac.cn

Phone: +86-591-63173355

Fax: +86-591-63173355

Journal: RSC Advances

Number of Pages: 8

Number of Figures: 7

**Fig. S1** SEM image of the CoP sample.

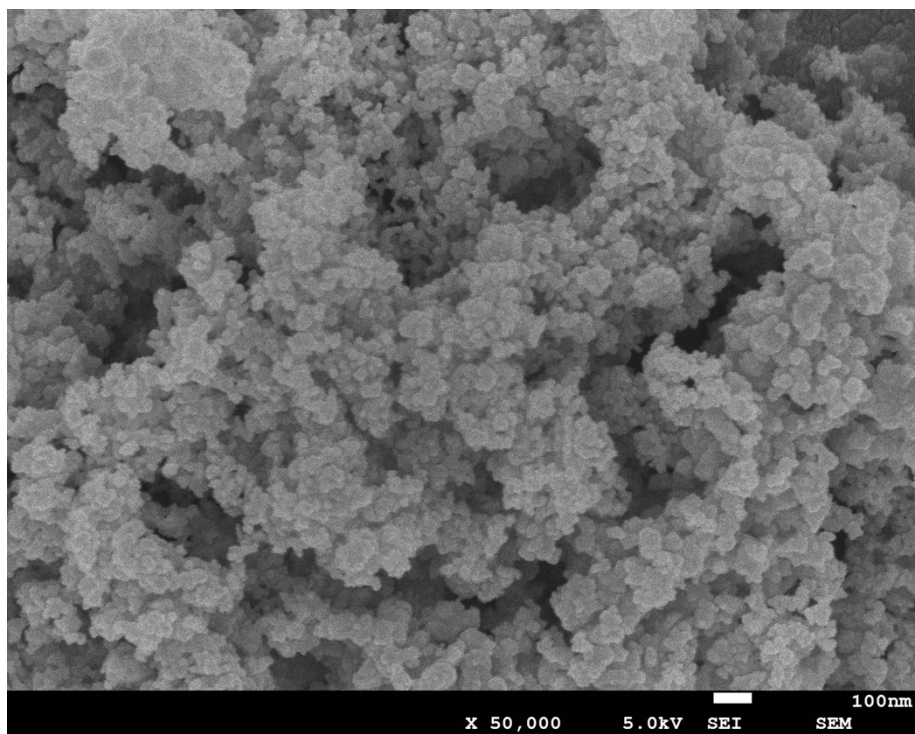

**Fig. S2** High-resolution XPS spectra of Co 2p and P 2p for the CoP sample

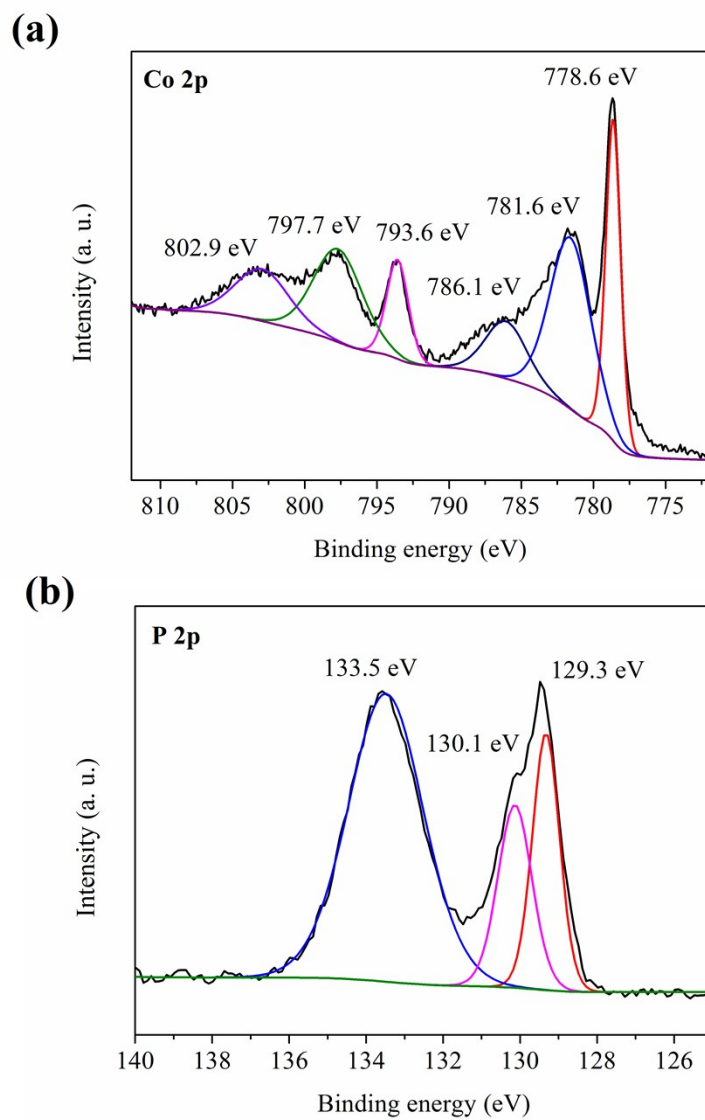

**Fig. S3** Electrochemical reduction of  $\text{H}_4\text{SiW}_{12}\text{O}_{40}$  by a two-compartment home-made H-cell by using a classical two-electrode configuration.

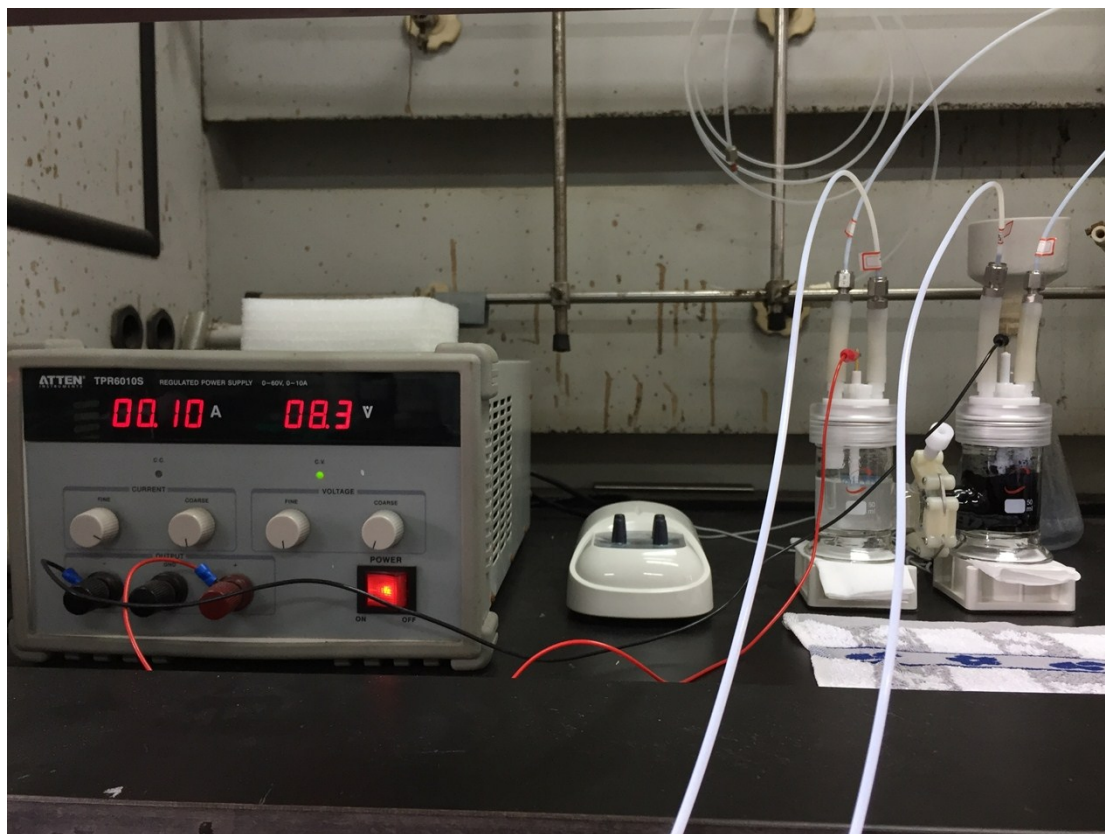

**Fig. S4** Production of hydrogen and oxygen during the durability experiment for the CoP sample.

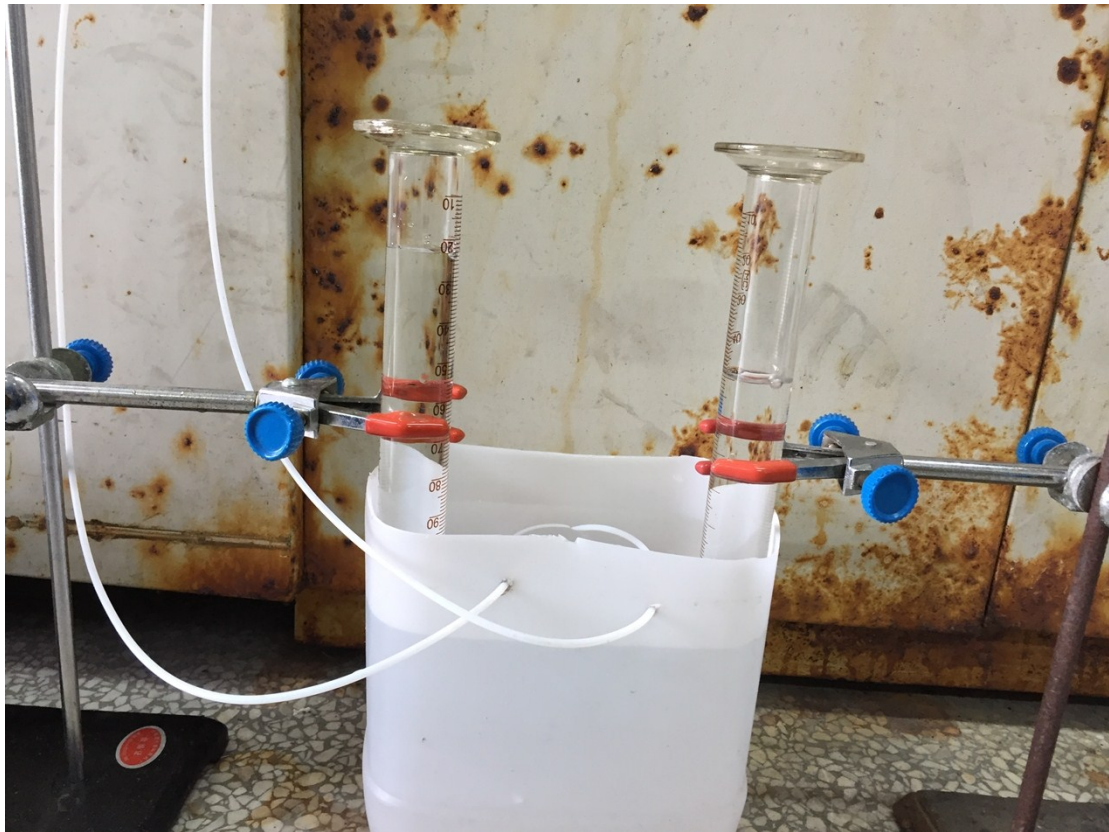

**Fig. S5** XRD patterns for the CoP sample before and after the catalytic test.

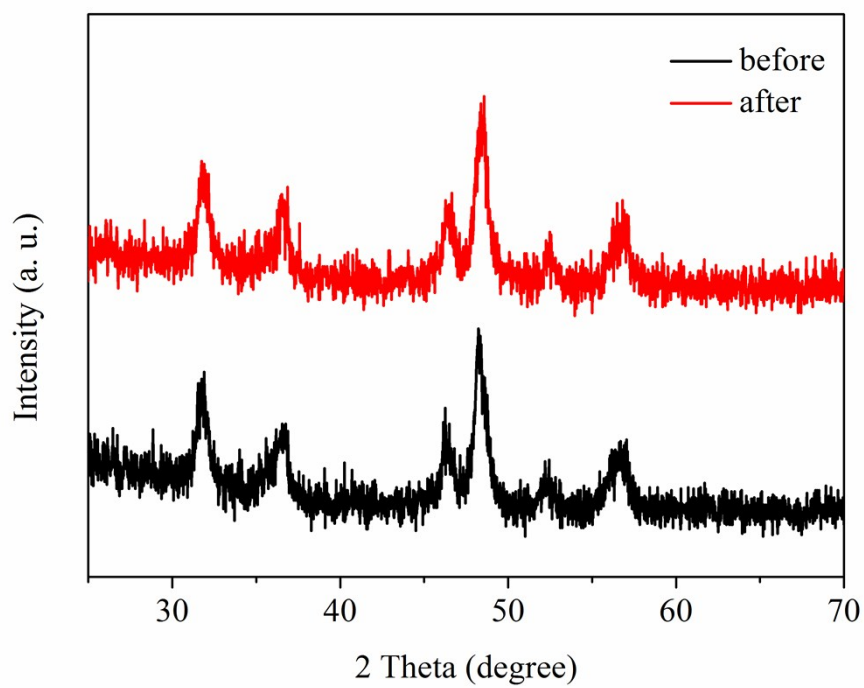

**Fig. S6** TEM image for the CoP sample after the catalytic test.

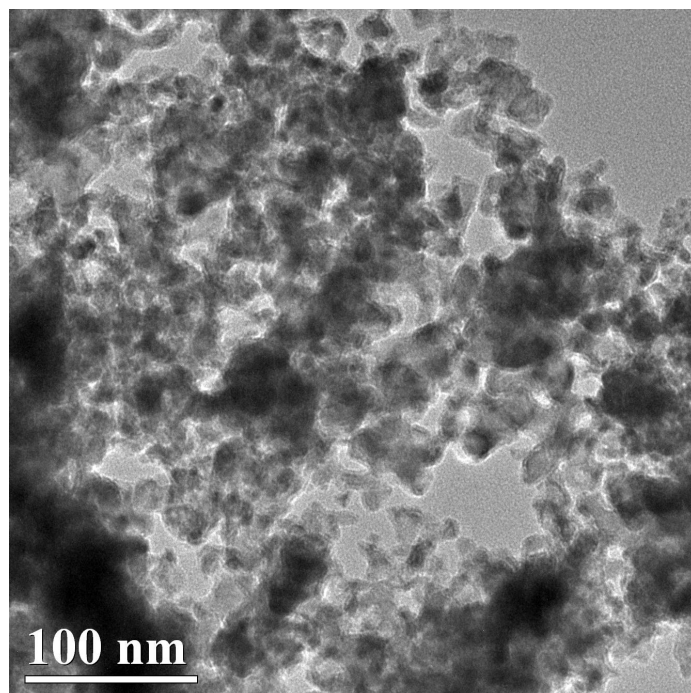

**Fig. S7** High-resolution XPS spectra of Co 2p and P 2p for the CoP sample before and after the catalytic test.

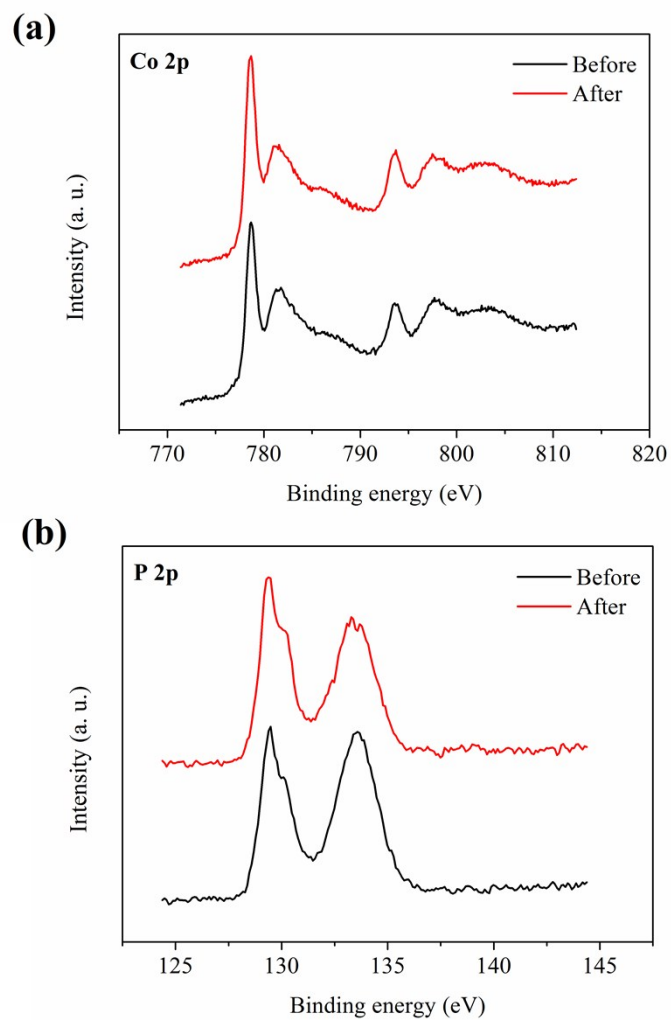

Supplement: c8ra07195k1.pdf [file c8ra07195k1.pdf]
